# Supplementary material
Source: publisher figshare collection journal article supplement (https://frontiersin.figshare.com/ndownloader/files/21931935)
Supplement: Supplementary file 1 [file 21931935]

## Supplementary Figures

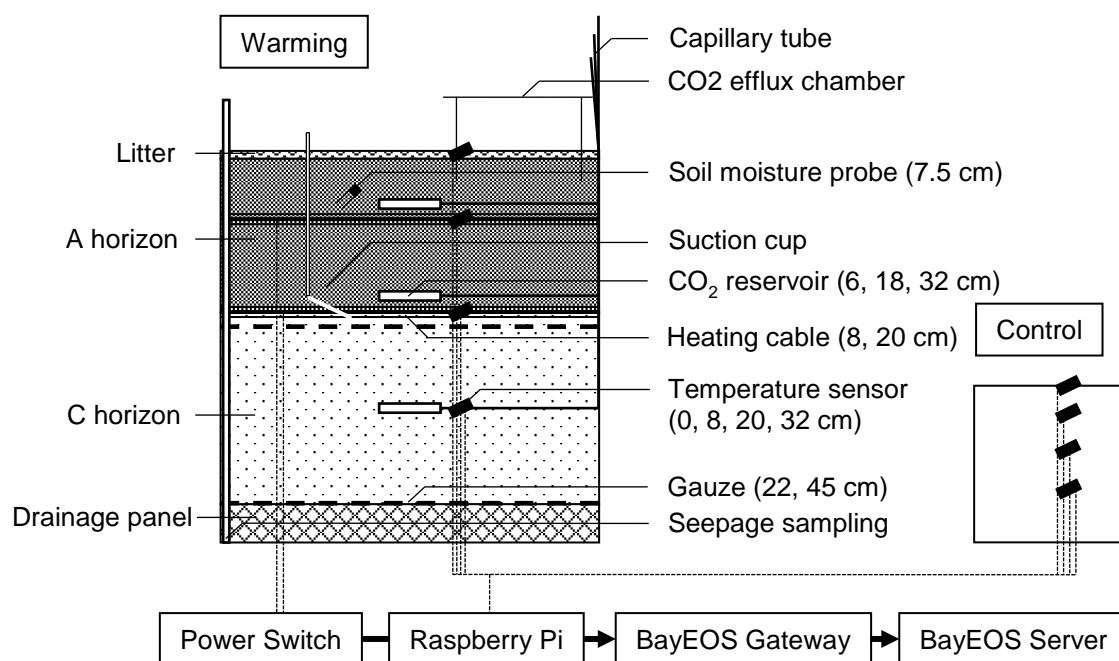

**Figure S1:** Setup of a lysimeter with temperature regulation by heating cables at two depths for soil warming. Temperature regulation refers to soil temperatures at same depths in a control lysimeter. All depths are referred to the mineral soil surface.

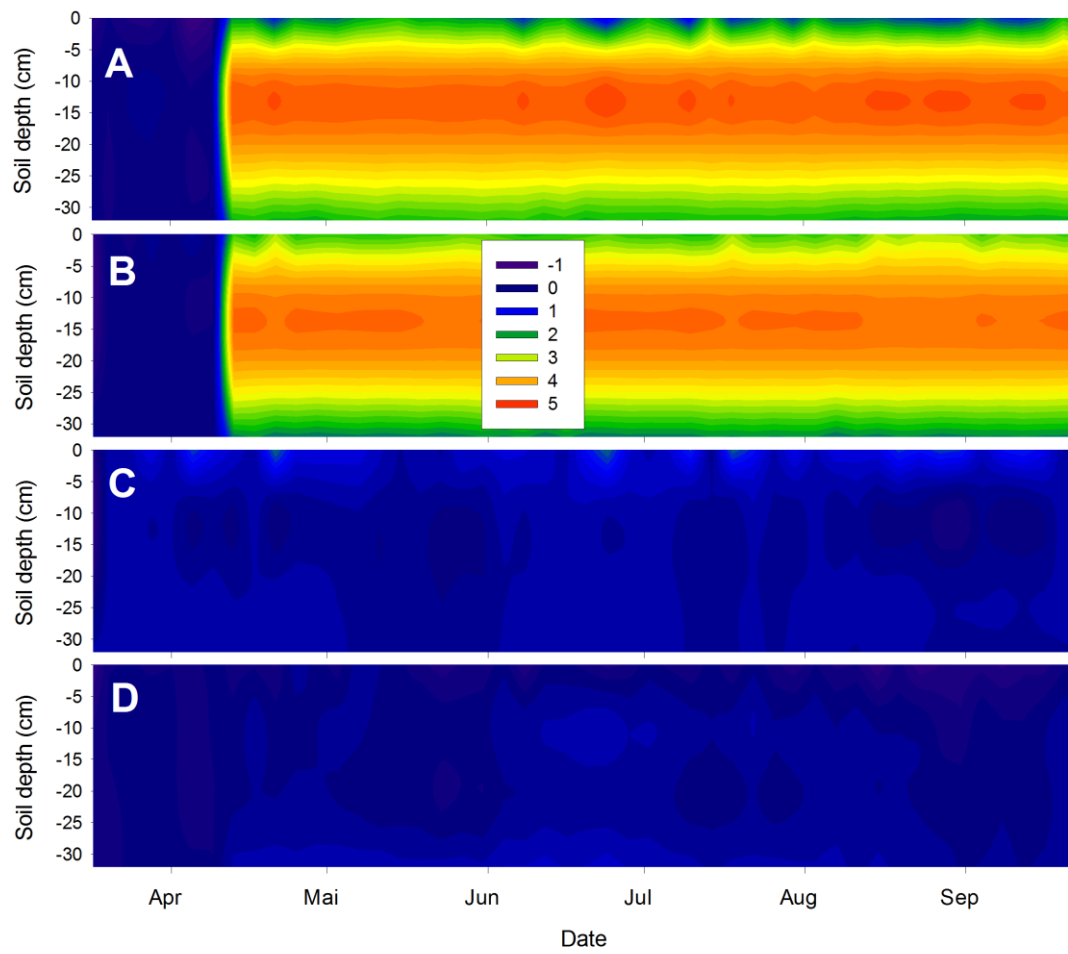

**Figure S2:** Performance of the soil warming system. Contour plots show soil temperature differences of (A) H versus C, (B) H+I versus I, (C) C versus I, and (D) H versus H+I at soil depths ranging from 0 to 32 cm. Soil warming started at April 11, 2016.

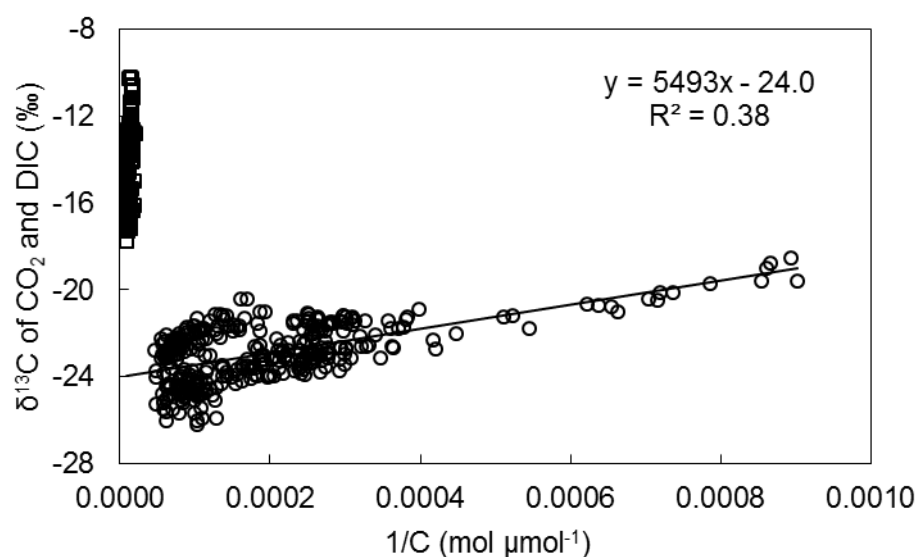

**Figure S3:** Isotope ratios plotted against the inverse of CO<sub>2</sub> concentrations (1/C) at 6, 18 and 32 cm depth (open circle) and DIC in seepage (open squares) after Keeling (1961). The linear regression line includes only values of CO<sub>2</sub> at 6, 18 and 32 cm depth. DIC concentrations (mg L<sup>-1</sup>) were converted to gaseous concentration (μmol mol<sup>-1</sup>) at 0°C and 100 kPa.
